# Supplementary material for: Palladium-catalyzed 2,5-diheteroarylation of 2,5-dibromothiophene derivatives
Source: publisher site journal article supplement (doi:10.3762/bjoc.10.309), 2014-12-09
Supplement: Additional file 1 [file 1860-5397-10-309-S1.pdf]

**Supporting Information**  
**for**  
**Palladium-catalysed 2,5-diheteroarylation of 2,5-**  
**dibromothiophene derivatives**

Fatma Belkessam<sup>1,2</sup>, Aidene Mohand<sup>2</sup>, Jean-François Soulé<sup>1</sup>, Abdelhamid Elias<sup>1,2\*</sup>, Henri Doucet<sup>1\*</sup>

Address: <sup>1</sup>Institut des Sciences Chimiques de Rennes, UMR 6226 CNRS-Université de Rennes, "Organométalliques: Matériaux et Catalyse", Campus de Beaulieu, 35042 Rennes, France, Tel.: 00-33-2-23-23-63-84, FAX 00-33-2-23-23-69-39 and <sup>2</sup>Département de chimie, Tizi Ouzou University, BP 17 RP 15000 Tizi-Ouzou, Algeria.

Email: Abdelhamid Elias - [hamghil@yahoo.fr](mailto:hamghil@yahoo.fr); Henri Doucet - [henri.doucet@univ-rennes1.fr](mailto:henri.doucet@univ-rennes1.fr)

\*Corresponding author

**Experimental procedures and characterization data**

## General information

All reactions were run under argon in Schlenk tubes using vacuum lines. DMA analytical grade was not distilled before use. KOAc (99%) was used. Commercial dibromothiophenes and heteroarenes were used without purification. The reactions were followed by GC and NMR.  $^1\text{H}$  NMR and  $^{13}\text{C}$  NMR spectra were recorded with a Bruker 400 MHz spectrometer in  $\text{CDCl}_3$  solutions. Chemical shifts are reported in ppm relative to  $\text{CDCl}_3$  (7.25 for  $^1\text{H}$  NMR and 77.0 for  $^{13}\text{C}$  NMR). Flash chromatography was performed on silica gel (230–400 mesh).

## General procedure

In a typical experiment, the 2,5-dibromothiophene (1 mmol), heteroarene derivative (3 mmol), KOAc (0.294 g, 3 mmol) and  $\text{PdCl}(\text{C}_3\text{H}_5)(\text{dppb})$  (12.1 mg, 0.02 mmol), were dissolved in DMA (5 mL) under an argon atmosphere. The reaction mixture was stirred at 140 °C for 20h. After evaporation of the solvent, the product was purified by silica gel column chromatography.

**Preparation of the  $\text{PdCl}(\text{C}_3\text{H}_5)(\text{dppb})$  catalyst [1]:** An oven-dried 40 mL Schlenk tube equipped with a magnetic stirring bar under argon atmosphere, was charged with  $[\text{Pd}(\text{C}_3\text{H}_5)\text{Cl}]_2$  (182 mg, 0.5 mmol) and dppb (426 mg, 1 mmol). 10 mL of anhydrous dichloromethane were added, then, the solution was stirred at room temperature for twenty minutes. The solvent was removed in vacuum. The yellow powder was used without purification.  $^{31}\text{P}$  NMR (81 MHz,  $\text{CDCl}_3$ )  $\delta$  = 19.3 (s).

### 5-(5-Bromothiophen-2-yl)-2-ethyl-4-methylthiazole (1a)

From 2,5-dibromothiophene (0.968 g, 4 mmol) and 2-ethyl-4-methylthiazole (0.127 g, 1 mmol) product **1a** was obtained in 52% (0.150 g) yield.

$^1\text{H}$  NMR (400 MHz,  $\text{CDCl}_3$ )  $\delta$  6.98 (d,  $J$  = 3.8 Hz, 1H), 6.80 (d,  $J$  = 3.8 Hz, 1H), 2.95 (q,  $J$  = 7.6 Hz, 2H), 2.47 (s, 3H), 1.36 (t,  $J$  = 7.6 Hz, 3H).

$\delta$   $^{13}\text{C}$  NMR (100 MHz,  $\text{CDCl}_3$ )  $\delta$  170.2, 148.1, 135.3, 130.2, 126.6, 123.4, 112.1, 26.8, 16.3, 14.0.

$\text{C}_{10}\text{H}_{10}\text{BrNS}_2$  (288.23): Calcd C 41.67, H 3.50; Found C 41.80, H 3.38.

### 2,5-Bis(2-ethyl-4-methylthiazol-5-yl)thiophene (1b)

From 2,5-dibromothiophene (0.242 g, 1 mmol) and 2-ethyl-4-methylthiazole (0.381 g, 3 mmol) product **1b** was obtained in 81% (0.270 g) yield.

$^1\text{H}$  NMR (400 MHz,  $\text{CDCl}_3$ )  $\delta$  6.96 (m, 2H), 2.94 (q,  $J$  = 7.6 Hz, 4H), 2.51 (s, 6H), 1.35 (t,  $J$  = 7.6 Hz, 6H).

$\delta$   $^{13}\text{C}$  NMR (100 MHz,  $\text{CDCl}_3$ )  $\delta$  169.9, 147.7, 133.9, 126.6, 123.9, 26.8, 16.5, 14.0.

$\text{C}_{16}\text{H}_{18}\text{N}_2\text{S}_3$  (334.52): Calcd C 57.45, H 5.42; Found C 57.30, H 5.28.

### **2,5-Bis(4-methylthiazol-5-yl)thiophene (2)**

From 2,5-dibromothiophene (0.242 g, 1 mmol) and 4-methylthiazole (0.297 g, 3 mmol) product **2** was obtained in 82% (0.228 g) yield.

$^1\text{H}$  NMR (400 MHz,  $\text{CDCl}_3$ )  $\delta$  8.58 (s, 2H), 7.10 (s, 2H), 2.64 (s, 6H).

$^{13}\text{C}$  NMR (100 MHz,  $\text{CDCl}_3$ )  $\delta$  150.1, 149.6, 134.1, 127.5, 125.0, 16.6.

$\text{C}_{12}\text{H}_{10}\text{N}_2\text{S}_3$  (278.42): Calcd C 51.77, H 3.62; Found C 51.89, H 3.49.

### **5,5''-Dimethyl-2,2':5',2''-terthiophene (3) [2]**

From 2,5-dibromothiophene (0.242 g, 1 mmol) and 2-methylthiophene (0.294 g, 3 mmol) product **3** was obtained in 74% (0.204 g) yield.

$^1\text{H}$  NMR (400 MHz,  $\text{CDCl}_3$ )  $\delta$  6.24 (s, 2H), 6.21 (d,  $J = 3.6$  Hz, 2H), 5.92 (d,  $J = 3.6$  Hz, 2H), 1.62 (s, 6H).

$^{13}\text{C}$  NMR (100 MHz,  $\text{CDCl}_3$ )  $\delta$  141.1, 137.7, 136.4, 128.2, 125.5, 125.4, 16.2.

### **5,5''-Dichloro-2,2':5',2''-terthiophene (4) [3]**

From 2,5-dibromothiophene (0.242 g, 1 mmol) and 2-chlorothiophene (0.356 g, 3 mmol) product **3** was obtained in 77% (0.244 g) yield.

$^1\text{H}$  NMR (400 MHz,  $\text{CDCl}_3$ )  $\delta$  6.97 (s, 2H), 6.91 (d,  $J = 3.8$  Hz, 2H), 6.83 (d,  $J = 3.8$  Hz, 2H).

$^{13}\text{C}$  NMR (100 MHz,  $\text{CDCl}_3$ )  $\delta$  135.5, 135.4, 129.0, 126.9, 124.4, 122.9.

### **5,5''-Dicarbonitrile-2,2':5',2''-terthiophene (5) [4]**

From 2,5-dibromothiophene (0.242 g, 1 mmol) and thiophene-2-carbonitrile (0.327 g, 3 mmol) product **3** was obtained in 62% (0.185 g) yield.

$^1\text{H}$  NMR (400 MHz,  $\text{CDCl}_3$ )  $\delta$  7.55 (d,  $J = 3.6$  Hz, 2H), 7.24 (s, 2H), 7.17 (d,  $J = 3.6$  Hz, 2H).

$^{13}\text{C}$  NMR (100 MHz,  $\text{CDCl}_3$ )  $\delta$  143.2, 138.3, 135.9, 126.9, 124.1, 113.8, 108.5.

### **5,5''-Diethyl [2,2':5',2''-Terthiophenyl]-5,5''-dicarboxylate (6)**

From 2,5-dibromothiophene (0.242 g, 1 mmol) and ethyl thiophene-2-carboxylate (0.468 g, 3 mmol) product **6** was obtained in 58% (0.227 g) yield.

$^1\text{H}$  NMR (400 MHz,  $\text{CDCl}_3$ )  $\delta$  7.68 (d,  $J = 3.9$  Hz, 2H), 7.18 (s, 2H), 7.13 (d,  $J = 3.9$  Hz, 2H), 4.35 (q,  $J = 7.6$  Hz, 4H), 1.38 (t,  $J = 7.6$  Hz, 6H).

$^{13}\text{C}$  NMR (100 MHz,  $\text{CDCl}_3$ )  $\delta$  161.9, 143.0, 136.6, 134.0, 132.3, 125.9, 124.2, 61.3, 14.3.

$\text{C}_{18}\text{H}_{16}\text{O}_4\text{S}_3$  (392.51): Calcd C 55.08, H 4.11; Found C 55.01, H 4.24.

### **2,5-Di(2-thienyl)thiophene (7) [5]**

From 2,5-dibromothiophene (0.242 g, 1 mmol) and thiophene (0.504 g, 6 mmol) product **7** was obtained in 85% (0.211 g) yield.

$^1\text{H}$  NMR (400 MHz,  $\text{CDCl}_3$ )  $\delta$  7.22 (d,  $J = 5.1$  Hz, 2H), 7.18 (d,  $J = 3.8$  Hz, 2H), 7.09 (s, 2H), 7.03 (dd,  $J = 5.1, 3.8$  Hz, 2H).

$^{13}\text{C}$  NMR (100 MHz,  $\text{CDCl}_3$ )  $\delta$  137.0, 136.2, 127.8, 124.4, 124.3, 123.7.

### **2,5-Bis(5-butylfuran-2-yl)thiophene (8)**

From 2,5-dibromothiophene (0.242 g, 1 mmol) and 2-*n*-butylfuran (0.372 g, 3 mmol) product **8** was obtained in 79% (0.259 g) yield.

$^1\text{H}$  NMR (400 MHz,  $\text{CDCl}_3$ )  $\delta$  7.09 (s, 2H), 6.39 (d,  $J = 3.1$  Hz, 2H), 6.04 (d,  $J = 3.1$  Hz, 2H), 2.68 (t,  $J = 7.6$  Hz, 4H), 1.68 (quint.,  $J = 7.6$  Hz, 4H), 1.43 (sext.,  $J = 7.6$  Hz, 4H), 0.97 (t,  $J = 7.6$  Hz, 6H).

$^{13}\text{C}$  NMR (100 MHz,  $\text{CDCl}_3$ )  $\delta$  156.1, 147.5, 132.0, 122.0, 106.9, 105.7, 30.2, 27.8, 22.2, 13.8.

$\text{C}_{20}\text{H}_{24}\text{O}_2\text{S}$  (328.47): Calcd C 73.13, H 7.36; Found C 73.21, H 7.24.

### **1,1'-(5,5'-(Thiophene-2,5-diyl)bis(furan-5,2-diyl))diethanone (9)**

From 2,5-dibromothiophene (0.242 g, 1 mmol) and 2-acetylfuran (0.330 g, 3 mmol) product **9** was obtained in 60% (0.180 g) yield.

$^1\text{H}$  NMR (400 MHz,  $\text{CDCl}_3$ )  $\delta$  7.43 (s, 2H), 7.24 (d,  $J = 3.6$  Hz, 2H), 6.67 (d,  $J = 3.6$  Hz, 2H), 2.52 (s, 6H).

$^{13}\text{C}$  NMR (100 MHz,  $\text{CDCl}_3$ )  $\delta$  186.0, 152.1, 151.7, 132.8, 126.1, 119.4, 108.2, 26.0.

$\text{C}_{16}\text{H}_{12}\text{O}_4\text{S}$  (300.33): Calcd C 63.99, H 4.03; Found C 63.87, H 4.00.

### **Dimethyl 5,5'-(thiophene-2,5-diyl)bis(2-methylfuran-3-carboxylate) (10)**

From 2,5-dibromothiophene (0.242 g, 1 mmol) and methyl 2-methylfuran-3-carboxylate (0.420 g, 3 mmol) product **10** was obtained in 63% (0.227 g) yield.

$^1\text{H}$  NMR (400 MHz,  $\text{CDCl}_3$ )  $\delta$  7.14 (s, 2H), 6.72 (s, 2H), 3.84 (s, 6H), 2.63 (s, 6H).

$^{13}\text{C}$  NMR (100 MHz,  $\text{CDCl}_3$ )  $\delta$  164.1, 158.6, 146.8, 131.5, 123.3, 115.2, 105.6, 51.4, 13.8.

$\text{C}_{18}\text{H}_{16}\text{O}_6\text{S}$  (360.38): Calcd C 59.99, H 4.47; Found C 60.20, H 4.21.

### **2,5-Bis(1-methylpyrrol-2-yl)thiophene (11) [6]**

From 2,5-dibromothiophene (0.242 g, 1 mmol) and 1-methylpyrrole (0.405 g, 5 mmol) product **11** was obtained in 78% (0.189 g) yield.

$^1\text{H}$  NMR (400 MHz,  $\text{CDCl}_3$ )  $\delta$  6.97 (s, 2H), 6.72 (m, 2H), 6.36 (dd,  $J = 3.0, 1.4$  Hz, 2H), 6.19 (t,  $J = 3.0$  Hz, 2H), 3.77 (s, 6H).

$^{13}\text{C}$  NMR (100 MHz,  $\text{CDCl}_3$ )  $\delta$  133.9, 126.9, 124.9, 124.1, 109.8, 107.9, 35.2.

### **2,5-Bis(3,5-dimethylisoxazol-4-yl)thiophene (12)**

From 2,5-dibromothiophene (0.242 g, 1 mmol) and 3,5-dimethylisoxazole (0.291 g, 3 mmol) product **12** was obtained in 80% (0.219 g) yield.

$^1\text{H}$  NMR (400 MHz,  $\text{CDCl}_3$ )  $\delta$  6.99 (s, 2H), 2.51 (s, 6H), 2.36 (s, 6H).

$^{13}\text{C}$  NMR (100 MHz,  $\text{CDCl}_3$ )  $\delta$  165.8, 158.3, 131.3, 126.4, 110.2, 12.0, 11.1.

$\text{C}_{14}\text{H}_{14}\text{N}_2\text{O}_2\text{S}$  (274.34): Calcd C 61.29, H 5.14; Found C 61.17, H 5.05.

### **2,5-Bis(5-chloro-1,3-dimethylpyrazole-4-yl) thiophene (13)**

From 2,5-dibromothiophene (0.242 g, 1 mmol) and 5-chloro-1,3-dimethylpyrazole (0.392 g, 3 mmol) product **13** was obtained in 83% (0.283 g) yield.

$^1\text{H}$  NMR (400 MHz,  $\text{CDCl}_3$ )  $\delta$  7.09 (s, 2H), 3.77 (s, 6H), 2.36 (s, 6H).

$^{13}\text{C}$  NMR (100 MHz,  $\text{CDCl}_3$ )  $\delta$  146.0, 131.8, 125.0, 111.1, 36.0, 13.9.

$\text{C}_{14}\text{H}_{14}\text{Cl}_2\text{N}_4\text{S}$  (341.26): Calcd C 49.27, H 4.14; Found C 49.40, H 4.27.

### **5,5'-(3-Methylthiophene-2,5-diyl)bis(2-ethyl-4-methylthiazole) (14)**

From 2,5-dibromo-3-methylthiophene (0.256 g, 1 mmol) and 2-ethyl-4-methylthiazole (0.381 g, 3 mmol) product **14** was obtained in 83% (0.289 g) yield.

$^1\text{H}$  NMR (400 MHz,  $\text{CDCl}_3$ )  $\delta$  6.87 (s, 1H), 2.84-2.74 (m, 4H), 2.32 (s, 3H), 2.14 (s, 3H), 2.00 (s, 3H), 1.23-1.13 (m, 6H).

$^{13}\text{C}$  NMR (100 MHz,  $\text{CDCl}_3$ )  $\delta$  172.8, 170.6, 152.0, 149.3, 139.3, 135.2, 131.0, 128.4, 125.5, 123.0, 28.1, 28.0, 17.7, 17.1, 15.6, 15.0, 14.9.

$\text{C}_{17}\text{H}_{20}\text{N}_2\text{S}_3$  (348.55): Calcd C 58.58, H 5.78; Found C 58.41, H 5.58.

### **5,5'-(3-Methylthiophene-2,5-diyl)bis(4-methylthiazole) (15)**

From 2,5-dibromo-3-methylthiophene (0.256 g, 1 mmol) and 4-methylthiazole (0.297 g, 3 mmol) product **15** was obtained in 80% (0.234 g) yield.

$^1\text{H}$  NMR (400 MHz,  $\text{CDCl}_3$ )  $\delta$  8.75 (s, 1H), 8.60 (s, 1H), 6.97 (s, 1H), 2.61 (s, 3H), 2.43 (s, 3H), 2.16 (s, 3H).

$^{13}\text{C}$  NMR (100 MHz,  $\text{CDCl}_3$ )  $\delta$  152.1, 151.2, 149.9, 149.1, 138.0, 133.4, 129.8, 126.8, 125.1, 122.8, 16.6, 15.9, 14.6.

$\text{C}_{13}\text{H}_{12}\text{N}_2\text{S}_3$  (292.44): Calcd C 53.39, H 4.14; Found C 53.29, H 4.27.

### **3',5,5''-Trimethyl-2,2':5',2''-terthiophene (16) [7]**

From 2,5-dibromo-3-methylthiophene (0.256 g, 1 mmol) and 2-methylthiophene (0.294 g, 3 mmol) product **16** was obtained in 73% (0.212 g) yield.

$^1\text{H}$  NMR (400 MHz,  $\text{CDCl}_3$ )  $\delta$  6.95-6.80 (m, 3H), 6.75 (s, 1H), 6.70 (s, 1H), 2.53 (s, 6H), 2.36 (s, 3H).

$^{13}\text{C}$  NMR (100 MHz, AcetoneD<sub>6</sub>)  $\delta$  141.3, 140.7, 136.1, 136.0, 135.6, 135.3, 131.1, 128.8, 127.9, 127.6, 127.0, 125.1, 16.2, 15.9, 15.8.

#### **5,5"-Dichloro-3'-methyl-2,2':5',2"-terthiophene (17)**

From 2,5-dibromo-3-methylthiophene (0.256 g, 1 mmol) and 2-chlorothiophene (0.356 g, 3 mmol) product **17** was obtained in 74% (0.245 g) yield.

$^1\text{H}$  NMR (400 MHz, CDCl<sub>3</sub>)  $\delta$  7.07 (d,  $J$  = 3.8 Hz, 1H), 7.07 (s, 1H), 7.03 (s, 2H), 6.98 (d,  $J$  = 3.8 Hz, 1H), 2.31 (s, 3H).

$^{13}\text{C}$  NMR (100 MHz, AcetoneD<sub>6</sub>)  $\delta$  137.3, 137.1, 136.2, 135.5, 130.7, 130.5, 130.1, 129.7, 129.4, 129.0, 127.1, 125.1, 16.2.

C<sub>13</sub>H<sub>8</sub>Cl<sub>2</sub>S<sub>3</sub> (331.30): Calcd C 47.13, H 2.43; Found C 47.11, H 2.34.

#### **5,5"-Diethyl [3'-methyl-2,2':5',2"-terthiophene]-5,5"-dicarboxylate (18)**

From 2,5-dibromo-3-methylthiophene (0.256 g, 1 mmol) and ethyl thiophene-2-carboxylate (0.468 g, 3 mmol) product **18** was obtained in 60% (0.244 g) yield.

$^1\text{H}$  NMR (400 MHz, CDCl<sub>3</sub>)  $\delta$  7.87 (d,  $J$  = 3.9 Hz, 1H), 7.81 (d,  $J$  = 3.9 Hz, 1H), 7.30-7.25 (m, 2H), 7.21 (s, 1H), 4.55-4.45 (m, 4H), 2.55 (s, 3H), 1.55-1.40 (m, 6H).

$^{13}\text{C}$  NMR (100 MHz, CDCl<sub>3</sub>)  $\delta$  162.0, 161.9, 143.1, 142.6, 136.4, 134.7, 134.0, 133.6, 132.9, 132.2, 130.9, 129.5, 125.6, 124.0, 61.2, 15.8, 14.4, 14.3.

C<sub>19</sub>H<sub>18</sub>O<sub>4</sub>S<sub>3</sub> (406.54): Calcd C 56.13, H 4.46; Found C 55.98, H 4.57.

#### **3'-Methyl-2,2':5',2"-terthiophene (19) [8]**

From 2,5-dibromo-3-methylthiophene (0.256 g, 1 mmol) and thiophene (0.504 g, 6 mmol) product **19** was obtained in 78% (0.204 g) yield.

$^1\text{H}$  NMR (400 MHz, CDCl<sub>3</sub>)  $\delta$  7.46 (d,  $J$  = 4.8 Hz, 1H), 7.37 (d,  $J$  = 4.8 Hz, 1H), 7.25-7.20 (m, 2H), 7.10-7.02 (m, 3H), 2.33 (s, 3H).

#### **Dimethyl 5,5'-(3-methylthiophene-2,5-diyl)bis(2-methylfuran-3-carboxylate) (20)**

From 2,5-dibromo-3-methylthiophene (0.256 g, 1 mmol) and methyl 2-methylfuran-3-carboxylate (0.420 g, 3 mmol) product **20** was obtained in 51% (0.191 g) yield.

$^1\text{H}$  NMR (400 MHz, CDCl<sub>3</sub>)  $\delta$  7.00 (s, 1H), 6.70 (s, 1H), 6.65 (s, 1H), 3.85 (s, 3H), 3.84 (s, 3H), 2.63 (s, 3H), 2.62 (s, 3H), 2.35 (s, 3H).

$^{13}\text{C}$  NMR (100 MHz, CDCl<sub>3</sub>)  $\delta$  164.4, 164.1, 156.5, 156.1, 147.0, 146.9, 134.4, 130.0, 126.7, 125.7, 115.2, 115.1, 106.8, 105.5, 54.0, 51.4, 15.6, 13.8, 13.7.

C<sub>19</sub>H<sub>18</sub>O<sub>6</sub>S (374.41): Calcd C 60.95, H 4.85; Found C 60.99, H 4.78.

### **2,2'-(3-Methylthiophene-2,5-diyl)bis(1-methylpyrrole) (21)**

From 2,5-dibromo-3-methylthiophene (0.256 g, 1 mmol) and 1-methylpyrrole (0.405 g, 5 mmol) product **21** was obtained in 77% (0.197 g) yield.

<sup>1</sup>H NMR (400 MHz, CDCl<sub>3</sub>) δ 6.86 (s, 1H), 6.75 (m, 1H), 6.70 (m, 1H), 6.34 (dd, *J* = 3.6, 1.8 Hz, 1H), 6.24 (dd, *J* = 3.6, 1.8 Hz, 1H), 6.21 (t, *J* = 3.4 Hz, 1H), 6.17 (t, *J* = 3.4 Hz, 1H), 3.77 (s, 3H), 3.59 (s, 3H), 2.18 (s, 3H).

<sup>13</sup>C NMR (100 MHz, CDCl<sub>3</sub>) δ 136.8, 133.9, 127.4, 127.3, 127.1, 125.3, 124.1, 123.2, 111.2, 109.7, 108.0, 107.5, 35.3, 34.5, 14.9.

C<sub>15</sub>H<sub>16</sub>N<sub>2</sub>S (256.37): Calcd C 70.27, H 6.29; Found C 70.37, H 6.37.

### **2,5-Bis(3,5-dimethylisoxazol-4-yl)-3-methylthiophene (22)**

From 2,5-dibromo-3-methylthiophene (0.256 g, 1 mmol) and 3,5-dimethylisoxazole (0.291 g, 3 mmol) product **22** was obtained in 75% (0.216 g) yield.

<sup>1</sup>H NMR (400 MHz, CDCl<sub>3</sub>) δ 6.86 (s, 1H), 2.52 (s, 3H), 2.38 (s, 3H), 2.35 (s, 3H), 2.22 (s, 3H), 2.10 (s, 3H).

<sup>13</sup>C NMR (100 MHz, CDCl<sub>3</sub>) δ 167.3, 165.6, 159.8, 158.4, 137.2, 131.3, 128.8, 124.4, 110.3, 109.1, 14.4, 12.1, 11.7, 11.3, 10.6.

C<sub>15</sub>H<sub>16</sub>N<sub>2</sub>O<sub>2</sub>S (288.36): Calcd C 62.48, H 5.59; Found C 62.19, H 5.69.

### **2-Ethyl-5-(5-(2-isobutylthiazol-5-yl)thiophen-2-yl)-4-methylthiazole (23)**

From 5-(5-bromothiophen-2-yl)-2-ethyl-4-methylthiazole **1a** (0.288 g, 1 mmol) and 2-isobutylthiazole (0.211 g, 1.5 mmol) product **23** was obtained in 89% (0.310 g) yield.

<sup>1</sup>H NMR (400 MHz, CDCl<sub>3</sub>) δ 7.71 (s, 1H), 7.05 (d, *J* = 3.8 Hz, 1H), 6.97 (d, *J* = 3.8 Hz, 1H), 2.97 (q, *J* = 7.6 Hz, 2H), 2.85 (d, *J* = 7.6 Hz, 2H), 2.54 (s, 3H), 2.18-2.07 (m, 1H), 1.38 (t, *J* = 7.6 Hz, 3H), 1.01 (d, *J* = 7.6 Hz, 6H).

<sup>13</sup>C NMR (100 MHz, CDCl<sub>3</sub>) δ 170.0, 169.4, 147.9, 137.9, 133.5, 133.4, 131.1, 126.9, 125.5, 123.9, 42.3, 29.7, 26.8, 22.2, 16.6, 14.0.

C<sub>17</sub>H<sub>20</sub>N<sub>2</sub>S<sub>3</sub> (348.55): Calcd C 58.58, H 5.78; Found C 58.40, H 5.71.

### **2-Ethyl-4-methyl-5-(5'-methyl-2,2'-bithiophen-5-yl)thiazole (24)**

From 5-(5-bromothiophen-2-yl)-2-ethyl-4-methylthiazole **1a** (0.288 g, 1 mmol) and 2-methylthiophene (0.147 g, 1.5 mmol) product **24** was obtained in 70% (0.213 g) yield.

<sup>1</sup>H NMR (400 MHz, CDCl<sub>3</sub>) δ 7.01 (d, *J* = 3.8 Hz, 1H), 6.96 (d, *J* = 3.8 Hz, 1H), 6.94 (d, *J* = 3.8 Hz, 1H), 6.66 (d, *J* = 3.8 Hz, 1H), 2.97 (q, *J* = 7.6 Hz, 2H), 2.55 (s, 3H), 2.48 (s, 3H), 1.39 (t, *J* = 7.6 Hz, 3H).

<sup>13</sup>C NMR (100 MHz, CDCl<sub>3</sub>) δ 169.8, 147.6, 139.5, 138.0, 134.5, 132.0, 127.0, 126.0, 124.4, 123.7, 123.2, 26.9, 16.6, 15.3, 14.1.

C<sub>15</sub>H<sub>15</sub>NS<sub>3</sub> (305.48): Calcd C 58.98, H 4.95; Found C 59.04, H 5.09.

**5'-(2-Ethyl-4-methylthiazol-5-yl)-2,2'-bithiophene-5-carbonitrile (25)**

From 5-(5-bromothiophen-2-yl)-2-ethyl-4-methylthiazole **1a** (0.288 g, 1 mmol) and thiophene-2-carbonitrile (0.164 g, 1.5 mmol) product **25** was obtained in 67% (0.212 g) yield.

<sup>1</sup>H NMR (400 MHz, CDCl<sub>3</sub>) δ 7.52 (d, *J* = 3.8 Hz, 1H), 7.22 (d, *J* = 3.8 Hz, 1H), 7.12 (d, *J* = 3.8 Hz, 1H), 7.01 (d, *J* = 3.8 Hz, 1H), 2.99 (q, *J* = 7.6 Hz, 2H), 2.56 (s, 3H), 1.39 (t, *J* = 7.6 Hz, 3H).  
<sup>13</sup>C NMR (100 MHz, CDCl<sub>3</sub>) δ 170.6, 148.4, 143.9, 138.1, 135.4, 134.4, 127.2, 126.2, 123.5, 123.2, 113.9, 107.4, 26.8, 16.6, 13.9.

C<sub>15</sub>H<sub>12</sub>N<sub>2</sub>S<sub>3</sub> (316.46): Calcd C 56.93, H 3.82; Found C 57.10, H 3.99.

**5-(2,2'-Bithiophen-5-yl)-2-ethyl-4-methylthiazole (26)**

From 5-(5-bromothiophen-2-yl)-2-ethyl-4-methylthiazole **1a** (0.288 g, 1 mmol) and thiophene (0.202 g, 2 mmol) product **26** was obtained in 41% (0.119 g) yield.

<sup>1</sup>H NMR (400 MHz, CDCl<sub>3</sub>) δ 7.23 (d, *J* = 5.1 Hz, 1H), 7.18 (d, *J* = 3.8 Hz, 1H), 7.11 (d, *J* = 3.8 Hz, 1H), 7.03 (dd, *J* = 5.1, 3.8 Hz, 1H), 6.98 (d, *J* = 3.8 Hz, 1H), 3.01 (q, *J* = 7.6 Hz, 2H), 2.58 (s, 3H), 1.40 (t, *J* = 7.6 Hz, 3H).

<sup>13</sup>C NMR (100 MHz, CDCl<sub>3</sub>) δ 147.6, 137.6, 136.8, 132.5, 127.9, 127.2, 124.7, 124.4, 124.0, 123.8, 26.8, 16.6, 14.2.

C<sub>14</sub>H<sub>13</sub>NS<sub>3</sub> (291.45): Calcd C 57.69, H 4.50; Found C 57.47, H 4.71.

**2-ethyl-4-methyl-5-(5-(1-methylpyrrol-2-yl)thiophen-2-yl)thiazole (27)**

From 5-(5-bromothiophen-2-yl)-2-ethyl-4-methylthiazole **1a** (0.288 g, 1 mmol) and 1-methylpyrrole (0.162 g, 2 mmol) product **27** was obtained in 74% (0.213 g) yield.

<sup>1</sup>H NMR (400 MHz, CDCl<sub>3</sub>) δ 7.02 (d, *J* = 3.8 Hz, 1H), 6.96 (d, *J* = 3.8 Hz, 1H), 6.73-6.70 (m, 1H), 6.36 (dd, *J* = 3.0, 1.4 Hz, 1H), 6.17 (t, *J* = 3.0 Hz, 1H), 3.75 (s, 3H), 2.98 (q, *J* = 7.6 Hz, 2H), 2.57 (s, 3H), 1.40 (t, *J* = 7.6 Hz, 3H).

<sup>13</sup>C NMR (100 MHz, CDCl<sub>3</sub>) δ 169.6, 147.3, 135.1, 132.4, 126.5, 126.4, 124.8, 124.3, 124.2, 110.0, 107.9, 35.1, 26.7, 16.4, 14.0.

C<sub>15</sub>H<sub>16</sub>N<sub>2</sub>S<sub>2</sub> (288.43): Calcd C 62.46, H 5.59; Found C 62.57, H 5.67.

**Methyl 5-(5-(2-ethyl-4-methylthiazol-5-yl)thiophen-2-yl)-2-methylfuran-3-carboxylate (28)**

From 5-(5-bromothiophen-2-yl)-2-ethyl-4-methylthiazole **1a** (0.288 g, 1 mmol) and methyl 2-methylfuran-3-carboxylate (0.210 g, 1.5 mmol) product **28** was obtained in 62% (0.215 g) yield.

<sup>1</sup>H NMR (400 MHz, CDCl<sub>3</sub>) δ 7.15 (d, *J* = 3.8 Hz, 1H), 6.98 (d, *J* = 3.8 Hz, 1H), 6.73 (s, 1H), 3.84 (s, 3H), 2.98 (q, *J* = 7.6 Hz, 2H), 2.63 (s, 3H), 2.55 (s, 3H), 1.38 (t, *J* = 7.6 Hz, 3H).

<sup>13</sup>C NMR (100 MHz, CDCl<sub>3</sub>) δ 170.1, 164.1, 158.6, 147.8, 146.7, 132.9, 132.6, 126.9, 124.2,

123.2, 115.2, 105.6, 51.4, 26.8, 16.6, 14.1, 13.8.

C<sub>17</sub>H<sub>17</sub>NO<sub>3</sub>S<sub>2</sub> (347.45): Calcd C 58.77, H 4.93; Found C 58.97, H 4.69.

#### **4-(5-(2-Ethyl-4-methylthiazol-5-yl)thiophen-2-yl)-3,5-dimethylisoxazole (29)**

From 5-(5-bromothiophen-2-yl)-2-ethyl-4-methylthiazole **1a** (0.288 g, 1 mmol) and 3,5-dimethylisoxazole (0.146 g, 1.5 mmol) product **29** was obtained in 66% (0.201 g) yield.

<sup>1</sup>H NMR (400 MHz, CDCl<sub>3</sub>) δ 7.06 (d, *J* = 3.8 Hz, 1H), 6.94 (d, *J* = 3.8 Hz, 1H), 2.98 (q, *J* = 7.6 Hz, 2H), 2.55 (s, 3H), 2.52 (s, 3H), 2.37 (s, 3H), 1.39 (t, *J* = 7.6 Hz, 3H).

<sup>13</sup>C NMR (100 MHz, CDCl<sub>3</sub>) δ 170.2, 165.9, 158.4, 147.9, 133.9, 131.5, 126.7, 126.5, 123.9, 110.2, 26.9, 16.6, 14.1, 12.1, 11.2.

C<sub>15</sub>H<sub>16</sub>N<sub>2</sub>O<sub>2</sub>S<sub>2</sub> (304.43): Calcd C 59.18, H 5.30; Found C 59.07, H 5.22.

#### **5-(5-(5-Chloro-1,3-dimethylpyrazol-4-yl)thiophen-2-yl)-2-ethyl-4-methylthiazole (30)**

From 5-(5-bromothiophen-2-yl)-2-ethyl-4-methylthiazole **1a** (0.288 g, 1 mmol) and 5-chloro-1,3-dimethylpyrazole (0.196 g, 1.5 mmol) product **30** was obtained in 72% (0.243 g) yield.

<sup>1</sup>H NMR (400 MHz, CDCl<sub>3</sub>) δ 7.10 (d, *J* = 3.8 Hz, 1H), 7.04 (d, *J* = 3.8 Hz, 1H), 3.82 (s, 3H), 2.98 (q, *J* = 7.6 Hz, 2H), 2.56 (s, 3H), 2.39 (s, 3H), 1.39 (t, *J* = 7.6 Hz, 3H).

<sup>13</sup>C NMR (100 MHz, CDCl<sub>3</sub>) δ 169.9, 147.5, 146.1, 133.3, 132.7, 126.5, 125.5, 125.3, 124.3, 111.0, 36.2, 26.9, 16.6, 14.2, 14.0.

C<sub>15</sub>H<sub>16</sub>ClN<sub>3</sub>S<sub>2</sub> (337.89): Calcd C 53.32, H 4.77; Found C 53.50, H 4.87.

#### **5-Bromo-5'-methyl-2,2'-bithiophene (31) [9]**

From 2,5-dibromothiophene (0.242 g, 1 mmol) and 2-methylthiophene (0.294 g, 3 mmol) product **31** was obtained in 35% (0.090 g) yield.

<sup>1</sup>H NMR (400 MHz, CDCl<sub>3</sub>) δ 6.82 (d, *J* = 3.8 Hz, 1H), 6.78 (d, *J* = 3.8 Hz, 1H), 6.70 (d, *J* = 3.8 Hz, 1H), 6.54 (d, *J* = 3.8 Hz, 1H), 2.36 (s, 3H).

#### **2,2'-Bithiophene (32)**

From 2-bromothiophene (0.163 g, 1 mmol) and thiophene (0.504 g, 6 mmol) product **32** was obtained in 58% (0.096 g) yield.

<sup>1</sup>H NMR (400 MHz, CDCl<sub>3</sub>) δ 7.19 (d, *J* = 5.1 Hz, 1H), 7.17 (d, *J* = 3.8 Hz, 1H), 7.00 (dd, *J* = 5.1, 3.8 Hz, 1H).

#### **1-Methyl-2-(thiophen-2-yl)pyrrole (33) [10]**

From 2-bromothiophene (0.163 g, 1 mmol) and 1-methylpyrrole (0.486 g, 6 mmol) product **33** was obtained in 61% (0.099 g) yield.

<sup>1</sup>H NMR (400 MHz, CDCl<sub>3</sub>) δ 7.25 (d, *J* = 5.1 Hz, 1H), 7.06 (dd, *J* = 5.1, 3.8 Hz, 1H), 7.02 (d, *J*

= 3.8 Hz, 1H), 6.72-6.68 (m, 1H), 6.35-6.30 (m, 1H), 6.16 (t,  $J$  = 4.0 Hz, 1H), 3.71 (s, 3H).

#### **4,7-Bis(2-ethyl-4-methylthiazol-5-yl)benzo[c][1,2,5]thiadiazole (34)**

From 4,7-dibromobenzo[c][1,2,5]thiadiazole (0.294 g, 1 mmol) and 2-ethyl-4-methylthiazole (0.381 g, 3 mmol) product **34** was obtained in 92% (0.355 g) yield.

$^1\text{H}$  NMR (400 MHz,  $\text{CDCl}_3$ )  $\delta$  7.66 (s, 2H), 3.05 (q,  $J$  = 7.6 Hz, 4H), 2.52 (s, 6H), 1.42 (t,  $J$  = 7.6 Hz, 6H).

$^{13}\text{C}$  NMR (100 MHz,  $\text{CDCl}_3$ )  $\delta$  172.5, 153.6, 150.1, 129.1, 125.3, 125.2, 26.8, 16.9, 14.0.

$\text{C}_{18}\text{H}_{18}\text{N}_4\text{S}_3$  (386.56): Calcd C 55.93, H 4.69; Found C 55.78, H 4.54.

#### **4,7-Bis(5-methylthiophen-2-yl)benzo[c][1,2,5]thiadiazole (35) [11]**

From 4,7-dibromobenzo[c][1,2,5]thiadiazole (0.294 g, 1 mmol) and 2-methylthiophene (0.294 g, 3 mmol) product **35** was obtained in 86% (0.282 g) yield.

$^1\text{H}$  NMR (400 MHz,  $\text{CDCl}_3$ )  $\delta$  7.75 (d,  $J$  = 3.6 Hz, 2H), 7.75 (s, 2H), 6.85 (d,  $J$  = 3.6 Hz, 2H), 2.57 (s, 6H).

$^{13}\text{C}$  NMR (100 MHz,  $\text{CDCl}_3$ )  $\delta$  152.6, 141.5, 137.1, 127.5, 126.3, 125.7, 125.1, 15.4.

#### **4,7-Di(thiophen-2-yl)benzo[c][1,2,5]thiadiazole (36) [12]**

From 4,7-dibromobenzo[c][1,2,5]thiadiazole (0.294 g, 1 mmol) and thiophene (0.504 g, 6 mmol) product **36** was obtained in 82% (0.246 g) yield.

$^1\text{H}$  NMR (400 MHz,  $\text{CD}_2\text{Cl}_2$ )  $\delta$  8.12-8.07 (m, 2H), 7.88-7.79 (m, 2H), 7.47 (t,  $J$  = 4.1 Hz, 2H), 7.20 (dd,  $J$  = 7.0, 4.3 Hz, 2H).

$^{13}\text{C}$  NMR (100 MHz,  $\text{CD}_2\text{Cl}_2$ )  $\delta$  153.1, 139.9, 128.4, 128.0, 127.4, 126.3, 126.1.

#### **4,7-Bis(1-methylpyrrol-2-yl)benzo[c][1,2,5]thiadiazole (37) [13]**

From 4,7-dibromobenzo[c][1,2,5]thiadiazole (0.294 g, 1 mmol) and 1-methylpyrrole (0.405 g, 5 mmol) product **37** was obtained in 78% (0.229 g) yield.

$^1\text{H}$  NMR (400 MHz,  $\text{CDCl}_3$ )  $\delta$  7.58 (s, 2H), 6.87 (m, 2H), 6.57 (dd,  $J$  = 3.6, 1.8 Hz, 2H), 6.33 (t,  $J$  = 3.0 Hz, 2H), 3.71 (s, 6H).

$^{13}\text{C}$  NMR (100 MHz,  $\text{CDCl}_3$ )  $\delta$  154.3, 130.1, 128.7, 125.4, 124.9, 111.9, 108.4, 35.7.

#### **4,7-Bis(3,5-dimethylisoxazol-4-yl)benzo[c][1,2,5]thiadiazole (38)**

From 4,7-dibromobenzo[c][1,2,5]thiadiazole (0.294 g, 1 mmol) and 3,5-dimethylisoxazole (0.291 g, 3 mmol) product **38** was obtained in 85% (0.277 g) yield.

$^1\text{H}$  NMR (400 MHz,  $\text{CDCl}_3$ )  $\delta$  7.53 (s, 2H), 2.43 (s, 6H), 2.29 (s, 6H).

$^{13}\text{C}$  NMR (100 MHz,  $\text{CDCl}_3$ )  $\delta$  167.1, 159.1, 153.9, 129.7, 123.8, 112.8, 12.1, 11.1.

$\text{C}_{16}\text{H}_{14}\text{N}_4\text{O}_2\text{S}$  (326.37): Calcd C 58.88, H 4.32; Found C 58.97, H 4.20.

## References

- [1] Cantat, T.; Génin, E.; Giroud, C.; Meyer G.; Jutand, A. *J. Organomet. Chem.* 2003, **687**, 365-376.
- [2] Beny, J. P.; Dhawan, S. N.; Kagan, J.; Sundlass, S. *J. Org. Chem.* **1982**, *47*, 2201-2204.
- [3] Kim, E. J.; Jung, K.-J.; Lee, I.-H.; Kim, B. R.; Kim, J.-J.; Park, J. K.; Lee, S.-G.; Yoon, Y.-J. *Bull. Korean Chem. Soc.* **2010**, *31*, 2985-2988.
- [4] Hu, J.; Liang, L.; Chen, T.; Liu, P.; Deng, W. *Dyes Pigments* **2014**, 158-161.
- [5] Hassan Omar, O.; Babudri, F.; Farinola, G. M.; Naso, F.; Operamolla, A.; Pedone, A. *Tetrahedron* **2011**, *67*, 486-494.
- [6] Borgwarth, K.; Rohde, N.; Ricken, C.; Hallensleben, M. L.; Mandler, D.; Heinze, J. *Adv. Mater.* **1999**, *11*, 1221-1226.
- [7] Kriste, B.; Tian, P.; Kossmehl, G.; Engelmann, G.; Jugelt, W. *Magn. Reson. Chem.* **1995**, *33*, 70-76.
- [8] Jadamiec, M.; Lapkowski, M.; Matlengiewicz, M.; Brembilla, A.; Henry, B.; Rodehueser, L. *Electrochim. Acta* **2007**, *52*, 6146-6154.
- [9] Nagaki, A.; Takabayashi, N.; Tomida, Y.; Yoshida, J.-i. *Org. Lett.* **2008**, *10*, 3937-3940.
- [10] Lotz, S.; Crause, C.; Olivier, A. J.; Liles, D. C.; Goerls, H.; Landman, M.; Bezuidenhout, D. I. *Dalton Trans.* **2009**, 697-710.
- [11] Chen, M.; Haeussler, M.; Moad, G.; Rizzardo, E. *Org. Biomol. Chem.* **2011**, *9*, 6111-6119.
- [12] Kim, J.-J.; Choi, H.; Lee, J.-W.; Kang, M.-S.; Song, K.; Kang, S. O.; Ko, J. *J. Mater. Chem.* **2008**, *18*, 5223-5229.
- [13] Sun, M.; Lan, L.; Wang, L.; Peng, J.; Cao, Y. *Macromol. Chem. Physics* **2008**, *209*, 2504-2509.
